# Supplementary material for: Impact of organic and inorganic fertilizers on the yield and quality of silage corn intercropped with soybean
Source: PeerJ. 2018 Oct 26;6:e5280. doi: 10.7717/peerj.5280 (PMC6204818; doi:10.7717/peerj.5280)
Supplement: Supplemental Information 1 — Raw data. [file peerj-06-5280-s001.xlsx]

## Sheet: Sheet7
		Growth (mean)				Plant Height		Fresh yield (t/ha)			Dry matter yield (t/ha)
Rep	Treat	CGRc	CGRSs	LAIc	LAIs	PHc	PHs	FYc	FYs	FYmix	DMc	DMs	DMmix
1	T1	29.565	9.79	2.5125	3.16425	198	108	32.133	23.877	56.01	7.98	5.89	13.87
1	T2	26.1075	9.085	2.42	3.15	183	99	25.0489	15.088	40.1369	5.51	3.978	9.4922
1	T3	22.55	7.81	2.18	2.81	153	78	17.277	11.433	28.71	3.566	2.842	6.408
1	T4	22.42	7.76	2.12	2.78	152	79	18.193	12.075	30.268	3.36	3.01	6.37
1	T5	28.9225	9.8775	2.46925	3.275	198	113	34.83	23.61	58.44	7.11	6.56	13.67
1	T6	26.6175	9.18	2.345	3.0125	186	99	25.05	15.51	40.56	5.14	4.21	9.35
1	T7	29.375	9.965	2.4975	3.225	196	111	32.42	23.98	56.4	7.53	5.985	13.519
1	T8	22.715	8.1825	2.1	2.79	155	79	17.76	11.777	29.537	3.871	2.772	6.639
1	T9	26.65	8.55	2.33	3.05	188	102	25.16	16.133	41.293	5.49	4.393	9.881
1	T10	18.6225	7.4225	1.825	2.5375	125	62	13.777	8.444	22.221	2.899	2.058	4.957
2	T1	28.0825	9.875	2.6025	3.1775	196	108	32.816	24.775	57.591	7.55	6.14	13.69
2	T2	26.5	8.06	2.34	3.015	185	99	25.025	15.948	40.973	5.645	4.335	9.98
2	T3	22.51	7.75	2.15	2.76	155	76	17.808	11.776	29.584	3.787	2.745	6.532
2	T4	22.41	7.71	2.14	2.75	152	77	18.32	12.434	30.754	3.87	3.27	7.145
2	T5	28.76	9.61	2.5925	3.19	186	114	32.44	23.89	56.33	7.87	5.96	13.83
2	T6	26.99	8.6475	2.39	3.0325	184	101	25.03	16.01	41.04	5.25	4.522	9.77
2	T7	28.0225	9.8675	2.5875	3.165	194	113	33.146	24.31	57.456	7.3198	6.29	13.611
2	T8	23.4575	7.5325	2.135	2.765	151	77	18.11	11.76	29.87	3.871	2.858	6.729
2	T9	26.77	8.51	2.32	2.99	183	100	26.01	15.51	41.52	5.23	4.22	9.451
2	T10	18.3875	7.0575	1.845	2.5325	129	66	14.42	8.787	23.207	3.033	2.148	5.181
3	T1	30.3713	8.9775	2.5575	3.21	197	111	32.99	24.07	57.06	7.563	6.3804	13.94
3	T2	26.4875	8.285	2.39075	3.0325	184	98	24.688	15.765	40.453	5.612	4.375	9.987
3	T3	22.52	7.74	2.18	2.83	149	75	17.942	11.886	29.828	4.176	3.023	7.199
3	T4	22.43	7.74	2.11	2.77	153	79	17.98	12.57	30.55	3.59	3.39	6.98
3	T5	29.9725	8.49	2.4475	3.1375	198	109	33.06	23.96	57.02	7.392	5.982	13.373
3	T6	27.3175	8.065	2.3675	3.0725	185	100	25.86	15.61	41.47	5.93	4.89	10.816
3	T7	30.285	8.985	2.5425	3.195	195	112	33.115	24.179	57.294	7.899	6.327	14.226
3	T8	21.27	7.6325	2.1175	2.7775	153	78	18.29	11.38	29.67	3.81	3.061	6.87
3	T9	25.98	8.64	2.37	2.9675	188	99	24.25	15.71	39.96	5.04	4.31	9.35
3	T10	16.4025	7.3025	1.835	2.535	127	64	14.31	8.909	23.219	3.165	2.387	5.552
4	T1	29.3396	9.5475	2.5575	3.11	197	110	32.67	23.9833	56.6533	7.59	6.34667	13.938
4	T2	26.365	8.47667	2.39	3.0925	184	100	26.04	15.6103	41.6503	5.33367	4.12933	9.463
4	T3	22.46	7.71	2.09	2.73	153	77	17.6667	11.6983	29.365	3.88633	2.82667	6.713
4	T4	22.34	7.68	2.12	2.71	151	76	18.53	12.25	30.78	3.89	3.22433	7.11
4	T5	28.2717	9.59167	2.5475	3.175	199	115	33.12	25.7433	58.8633	7.64	6.23	13.87
4	T6	26.975	8.63083	2.3675	3.0725	185	100	25.8627	16.2633	42.126	5.21733	4.019	9.24
4	T7	29.2275	9.60583	2.5425	3.195	195	112	32.905	24.1563	57.0613	7.59	6.19167	13.7853
4	T8	22.4808	7.7825	2.1175	2.7775	153	78	17.9253	11.7833	29.7087	3.84667	2.897	6.74233
4	T9	25.98	8.49	2.34	3.07	186	98	25.21	16.22	41.43	5.42767	4.54	9.96667
4	T10	17.8042	7.26083	1.835	2.535	127	64	14.169	8.71333	22.8823	3.03233	2.19767	5.23
		Growth (mean)				Plant Height		Fresh yield (t/ha)			Dry matter yield (t/ha)
Rep	Treat	CGRc	CGRSs	LAIc	LAIs	PHc	PHs	FYc	FYs	FYmix	DMc	DMs	DMmix
100%NPK	T1	29.3396	9.5475	2.5575	3.16544	197	109.25	32.6523	24.1763	56.8286	7.67075	6.18927	13.8595
100%CD	T2	26.365	8.47667	2.38519	3.0725	184	99	25.2005	15.6028	40.8033	5.52517	4.20433	9.73055
BG	T3	22.51	7.7525	2.15	2.7825	152.5	76.5	17.6734	11.6983	29.3718	3.85383	2.85917	6.713
50%CD+GB	T4	22.4	7.7225	2.1225	2.7525	152	77.75	18.2558	12.3323	30.588	3.6775	3.01	6.90125
50%CD+2/3NPK	T5	28.9817	9.39229	2.51419	3.19437	195.25	112.75	33.3625	24.3008	57.6633	7.503	6.183	13.6857
2/3NPK+_BG	T6	26.975	8.63083	2.3675	3.0475	185	100	25.4507	15.8483	41.299	5.38433	4.41025	9.794
50%CD+2/3NPK+GB	T7	29.2275	9.60583	2.5425	3.195	195	112	32.8965	24.1563	57.0528	7.5847	6.19842	13.7853
50%CD	T8	22.4808	7.7825	2.1175	2.7775	153	78	18.0213	11.6751	29.6964	3.97	2.897	6.74508
2/3NPK	T9	26.345	8.5475	2.34	3.01938	186.25	99.75	25.1575	15.8933	41.0508	5.29692	4.36575	9.66217
NO FERTILIZER	T10	17.8042	7.26083	1.835	2.535	127	64	14.169	8.71333	22.8823	3.03233	2.19767	5.23
