# Supplementary material for: Impact of organic and inorganic fertilizers on the yield and quality of silage corn intercropped with soybean
Source: PeerJ. 2018 Oct 26;6:e5280. doi: 10.7717/peerj.5280 (PMC6204818; doi:10.7717/peerj.5280)
Supplement: Supplemental Information 2 [file peerj-06-5280-s002.xlsx]

## Sheet: Sheet2
	corn+soybean mix forage
Rep	Treat	CPmix	NDFmix	ADFmix	DMDmix	WSCmix	ADLmix	ProteinYmix
1	T1	14.51	57.97	36.83	68.14	23.88	3.67	2012.54
1	T2	14.51	49.05	26.65	65.5078	22.66	3.69	1377.32
1	T3	12.98	56.74	34.68	66.34	22.31	3.33	831.758
1	T4	13.28	58.88	36.88	66.82	22.12	3.75	845.936
1	T5	14.55	48.94	26.67	69.55	21.79	3.62	1988.99
1	T6	13.15	56.14	35.55	65.6915	23.01	3.82	1229.53
1	T7	14.61	49.33	26.73	66.64	22.67	3.72	1975.13
1	T8	12.94	57.24	33.14	67.02	21.87	3.91	859.087
1	T9	13.12	55.57	36.71	66.76	24.15	4.07	1296.39
1	T10	12.26	57.78	36.64	66.18	25.22	4.06	607.728
2	T1	14.49	58.24	33.57	66.5078	21.97	3.69072	1983.68
2	T2	14.5536	49.73	26.0555	65.8865	21.7852	3.71133	1452.45
2	T3	13.38	58.05	37.976	66.7367	22.4434	4.01	873.982
2	T4	13.2516	57.15	36.6745	67.1698	22.2358	3.76963	946.827
2	T5	14.44	49.24	26.8282	64.9329	21.96	3.64147	1997.05
2	T6	13.4297	58.43	34.3876	66.0777	21.1453	3.82234	1312.08
2	T7	14.39	49.61	26.8785	67.0102	22.7959	3.72056	1958.62
2	T8	13.02	57.57	33.3326	67.4095	21.9971	3.92266	876.116
2	T9	12.99	59.92	34.9118	67.0999	20.2707	3.78	1227.68
2	T10	12.3308	58.11	36.8517	66.5624	22.331	3.89	638.861
3	T1	14.62	57.47	35.5541	65.6915	21.3065	4.0479	2038.03
3	T2	14.49	48.95	27.3453	66.0647	22.9013	4.0682	1447.12
3	T3	13.2459	60.26	36.2455	66.9059	22.7442	3.71048	953.574
3	T4	13.71	56.38	36.9648	67.3624	22.5454	4.12735	956.958
3	T5	14.66	50.45	27.1166	68.109	22.9192	3.99	1960.48
3	T6	13.55	59.65	37.6664	66.2521	23.0452	4.06331	1465.57
3	T7	14.49	49.83	27.1718	67.1926	23.13	4.07	2061.35
3	T8	13.34	57.77	36.62	67.5823	22.33	3.88	916.458
3	T9	13.53	57.12	34.1785	67.29	23.5779	3.44972	1265.05
3	T10	12.66	58.31	36.1134	66.7387	19.6431	3.43926	702.883
4	T1	14.39	55.68	36.7651	64.91	20.9175	3.25894	2005.68
4	T2	14.36	49.16	26.5563	65.2757	21.3012	3.27924	1358.89
4	T3	13.67	57.47	35.4566	66.11	21.9553	3.92153	917.667
4	T4	13.2944	59.59	34.1758	66.57	21.7565	3.33839	945.231
4	T5	14.5729	50.06	26.3277	64.32	21.943	3.20932	2021.26
4	T6	13.25	59.87	36.8774	65.4632	22.6562	3.38975	1224.3
4	T7	14.7105	49.05	26.3828	66.43	22.3116	3.28886	2027.89
4	T8	13.83	56.98	37.8149	65.7933	23.5121	3.46667	932.465
4	T9	13.69	58.31	35.3895	66.5085	22.7889	3.66076	1364.44
4	T10	11.874	57.52	36.3244	65.9498	21.66	3.65031	621.01
